# Supplementary material for: Reconstructing the phylogeny of Blattodea: robust support for interfamilial relationships and major clades
Source: PubMed Central journal article supplement (PMC5478607; doi:10.1038/s41598-017-04243-1), 2017-06-20

Supplementary Data for:

# Reconstructing the phylogeny of Blattodea: Robust support for interfamilial relationships and major clades

Zongqing Wang<sup>1</sup>, Yan Shi<sup>1</sup>, Zhiwei Qiu<sup>1</sup>, Yanli Che<sup>1</sup>, Nathan Lo<sup>2\*</sup>

<sup>1</sup> College of Plant Protection, Southwest University, Beibei, Chongqing, China

<sup>2</sup> School of Life and Environmental Sciences, University of Sydney, Sydney, New South Wales, Australia

\* Corresponding author

E-mail: nathan.lo@sydney.edu.au

Table S1. Data for new specimens included in this study

Table S2. PCR conditions used for gene amplification (35 cycles after initial denaturing step)

Table S3. Genbank numbers for included sequences. The colours indicate the sources of the sequences.

Fig S1 Bayesian inference (BI) tree derived from combined data 12S rRNA, 16S rRNA, COII, 28S rRNA and H3 genes. Number above branches representing BPP.

Fig S2. *Anaplecta omei*, A. supra-anal plate (male, ventral view); B. subgenital plate and phallomeres (male, dorsal view); C. supra-anal plate (female, ventral view); D. female genitalia (dorsal view). (All photos are original and taken by the authors).

**Table S1.** Data for new specimens included in this study

| Family       | Species                                  | Locality                                 | Collectors                   |
|--------------|------------------------------------------|------------------------------------------|------------------------------|
| Nocticolidae | <i>Nocticola</i> <b>sp. 1</b> (China)    | Zhuji, Zhejiang                          | Tiexiong Zhao                |
| Corydiidae   | <i>Eucorydia purpuralis</i>              | Wuyi Mountain, Fujian                    | Shunhua Gui                  |
|              | <i>Eupolyphaga sinensis</i>              | Xi Mountain, Beijing                     | Bingqiang Wang               |
|              | <i>Eupolyphaga yunnanensis</i>           | Weixi, Yunnan                            | Jianyue Qiu                  |
|              | <i>Polyphaga plancyi</i>                 | Zhaocheng, Shandong                      | Zhong Peng                   |
|              | <i>Ergaula</i> <b>sp.</b>                | Wuzhi Mountain, Hainan                   | Xinran Li, Zhiwei Qiu        |
| Ectobiidae   | <i>Blattella germanica</i>               | Shapingba, Chongqing                     | Yang Li                      |
|              | <i>Blattella bisignata</i>               | Dahei Mountain, Panzhihua, Sichuan       | Keliang Wu                   |
|              | <i>Blattella nipponica</i> 01            | Simian Mountain, Jiangjin, Chongqing     | Zongqing Wang                |
|              | <i>Blattella nipponica</i> 02            | Mojiang, Puhe, Yunnan                    | Zongqing Wang                |
|              | <i>Episymphloe hunanensis</i>            | Nanling Forest Park, Guangdong           | Zaifu Xu                     |
|              | <i>Episymphloe kunmingi</i>              | Liang Mountain, Kunming, Yunnan          | Dong Wang                    |
|              | <i>Episymphloe mamillatus</i> 01         | Zixi Mountain, Chuxiong, Yunnan          | Dong Wang                    |
|              | <i>Haplosymphloe aurantiaca</i> 01       | Jianfengling Forest Park, Ledong, Hainan | Shunhua Gui, Xinran Li       |
|              | <i>Haplosymphloe aurantiaca</i> 03       | Wuzhishan, Hainan                        | Shunhua Gui, Xinran Li       |
|              | <i>Hemithyrlocera banvaneuensis</i> 01   | Dadugang, Jinghong, Yunnan               | Xinran Li, Hongguang Liu     |
|              | <i>Hemithyrlocera banvaneuensis</i> 02   | Dadugang, Jinghong, Yunnan               | Xinran Li                    |
|              | <i>Hemithyrlocera simulans</i> 02        | Dadugang, Jinghong, Yunnan               | Xinran Li, Hongguang Liu     |
|              | <i>Hemithyrlocera simulans</i> 03        | Dadugang, Jinghong, Yunnan               | Xinran Li, Hongguang Liu     |
|              | <i>Sigmella schenklingi</i> 01           | Hejiaping, Changyang, Hebei              | Xiaoqiao Wang                |
|              | <i>Symphloe evidens</i> 01               | Qixianling Forest Park, Baoting, Hainan  | Shunhua Gui, Yan Shi         |
|              | <i>Symphloe ridleyi</i> 03               | Menglun, Xishuangbanna, Yunnan           | Xinran Li, Hongguang Liu     |
|              | <i>Symphloe striata</i> 01               | Tongmu, Wuyi Mountain, Fujian            | Shunhua Gui, Yan Shi         |
|              | <i>Symphloe torchaceus</i> 01            | Diaoluo Mountain, Lingshui, Hainan       | Yan Shi                      |
|              | <i>Lobopterella dimidiatipes</i> 01      | Hongshulin Park, Sanya, Hainan           | Shunhua Gui                  |
|              | <i>Anaplectoidea spinea</i> 01           | Nabang, Yinjiang, Yunnan                 | Dong Wang                    |
|              | <i>Anaplectoidea varia</i> 01            | E'mei Mountain, Sichuan                  | Jinjin Wang                  |
|              | <i>Allacta ornata</i> 03                 | Diaoluo Mountain, Lingshui, Hainan       | Shunhua Gui, Yan Shi         |
|              | <i>Shelfordina volubilis</i> 01          | Diaoluo Mountain, Lingshui, Hainan       | Shunhua Gui, Yan Shi         |
|              | <i>Shelfordina volubilis</i> 02          | Diaoluo Mountain, Lingshui, Hainan       | Shunhua Gui, Yan Shi         |
|              | <i>Sorineuchora nigra</i> 01             | Dadugang, Jinghong, Yunnan               | Keliang Wu                   |
|              | <i>Balta valida</i> 01                   | Dadugang, Jinghong, Yunnan               | Xinran Li, Hongguang Liu     |
|              | <i>Balta valida</i> 02                   | Wuzhi Mountain, Hainan                   | Shunhua Gui, Xinran Li       |
| Blaberidae   | <i>Diploptera punctata</i> 02            | Menglun, Xishuangbanna, Yunnan           | Guo Zheng                    |
|              | <i>Opisthoplatia orientalis</i> 01       | Baiwangling, Changjiang, Hainan          | Qikun Bai, Lu Qiu            |
|              | <i>Paranauphoeta</i> <b>sp.1</b> (China) | Limu Mountain, Qiongzong, Hainan         | Xinran Li                    |
|              | <i>Paranauphoeta vicina sinica</i> 01    | Xima Town, Yingjiang, Yunnan             | Jianyue Qiu                  |
|              | <i>Pycnoscelus</i> <b>sp.1</b> (China)   | Maogan Village, Baoting, Hainan          | Xinran Li, Qikun Bai, Lu Qiu |

|                |                                                                                                                                                                                                                                                                                                                                                                                                                                                                                                                                                                                                                                                                                                                                                                                     |                                                                                                                                                                                                                                                                                                                                                                                                                                                                                                                                                                                                                                                                                                                                       |                                                                                                                                                                                                                                                                                                                                                                                                                                                                             |
|----------------|-------------------------------------------------------------------------------------------------------------------------------------------------------------------------------------------------------------------------------------------------------------------------------------------------------------------------------------------------------------------------------------------------------------------------------------------------------------------------------------------------------------------------------------------------------------------------------------------------------------------------------------------------------------------------------------------------------------------------------------------------------------------------------------|---------------------------------------------------------------------------------------------------------------------------------------------------------------------------------------------------------------------------------------------------------------------------------------------------------------------------------------------------------------------------------------------------------------------------------------------------------------------------------------------------------------------------------------------------------------------------------------------------------------------------------------------------------------------------------------------------------------------------------------|-----------------------------------------------------------------------------------------------------------------------------------------------------------------------------------------------------------------------------------------------------------------------------------------------------------------------------------------------------------------------------------------------------------------------------------------------------------------------------|
|                | <p><i>Panchlora</i> <b>sp.</b></p> <p><i>Panesthia sinuata</i> 01</p> <p><i>Panesthia sinuata</i> 02</p> <p><i>Panesthia angustipennis cognate</i> 01</p> <p><i>Panesthia angustipennis cognate</i> 02</p> <p><i>Panesthia birmanica</i> 01</p> <p><i>Panesthia birmanica</i> 02</p> <p><i>Salganea raggei</i> 01</p> <p><i>Salganea raggei</i> 02</p> <p><i>Salganea incerta</i> 01</p> <p><i>Salganea incerta</i> 02</p> <p><i>Salganea taiwanensis</i> 01</p> <p><i>Salganea taiwanensis</i> 02</p> <p><i>Perisphaerus</i> <b>sp.1</b></p> <p><i>Perisphaerus</i> <b>sp.2</b></p> <p><i>Corydidarum</i> <b>sp.</b></p> <p><i>Corydidarum</i> <b>sp.</b></p> <p><i>Pseudophoraspis</i> <b>sp.</b></p> <p><i>Stictolampra</i> <b>sp.</b></p> <p><i>Rhabdoblatta</i> <b>sp.</b></p> | <p>Southwest University, Beibei, Chongqing</p> <p>Menghai, Yunnan</p> <p>Menghai, Yunnan</p> <p>Beibeng, Motuo, Xizang</p> <p>Beibeng, Motuo, Xizang</p> <p>Dadugang, Jinghong, Yunnan</p> <p>Dadugang, Jinghong, Yunnan</p> <p>Wuzhishan, Hainan</p> <p>Jianfengling Forest Park, Ledong, Hainan</p> <p>Wawushan, Hongya, Sichuan</p> <p>Simianshan, Jiangjin, Chongqing</p> <p>Daqiutianbao, Jiulianshan Town, Jiangxi</p> <p>Lianghe Town, Kang County, Gansu</p> <p>Baigougou, Zunyi, Guizhou</p> <p>Diaoluo Mountain, Lingshui, Hainan</p> <p>Bubeng, Mengla, Yunnan</p> <p>Bubeng, Mengla, Yunnan</p> <p>Limu Mountain, Qiongzong, Hainan</p> <p>Diaoluo Mountain, Lingshui, Hainan</p> <p>Limu Mountain, Qiongzong, Hainan</p> | <p>Unknown</p> <p>Jishan Xu, LingXiao Chang</p> <p>Jishan Xu, LingXiao Chang</p> <p>Tao Zou</p> <p>Tao Zou</p> <p>Xinran Li</p> <p>Xinran Li</p> <p>Xinran Li</p> <p>ShunHua Gui</p> <p>Yang Li</p> <p>Hao Xu</p> <p>Tao Zou</p> <p>Jinjin Wang</p> <p>Yuhong Zheng, Xiudan Wang</p> <p>Shunhua Gui, Xinran Li</p> <p>Guo Zheng, Xue Li, Wenyue Zhu</p> <p>Guo Zheng, Xue Li, Wenyue Zhu</p> <p>Xinran Li, Zhiwei Qiu</p> <p>Lu Qiu, Qikun Bai</p> <p>Lu Qiu, Qikun Bai</p> |
| Blattidae s.s. | <p><i>Homalophilpa arcifera</i> 01</p> <p><i>Homalophilpa kryzhanovskii</i> 01</p> <p><i>Protagonista lugubris</i> 01</p> <p><i>Protagonista lugubris</i> 05</p> <p><i>Melanozosteria</i> <b>sp.</b></p>                                                                                                                                                                                                                                                                                                                                                                                                                                                                                                                                                                            | <p>Shangyong Town, Mengla, Yunnan</p> <p>Dadugang, Jinghong, Yunnan</p> <p>Longtan Forest Park, Guiping, Guangxi</p> <p>Wangtianshu, Mengla, Yunnan</p> <p>Limu Mountain, Qiongzong, Hainan</p>                                                                                                                                                                                                                                                                                                                                                                                                                                                                                                                                       | <p>Jianyue Qiu</p> <p>Xinran Li</p> <p>Shunhua Gui, Xinran Li</p> <p>Jianyue Qiu</p> <p>Xinran Li, Zhiwei Qiu</p>                                                                                                                                                                                                                                                                                                                                                           |
| Anaplectidae   | <p><i>Anaplecta omei</i> 01</p>                                                                                                                                                                                                                                                                                                                                                                                                                                                                                                                                                                                                                                                                                                                                                     | <p>Campus of Southwest University</p>                                                                                                                                                                                                                                                                                                                                                                                                                                                                                                                                                                                                                                                                                                 | <p>Jinjin Wang, Keliang Wu</p>                                                                                                                                                                                                                                                                                                                                                                                                                                              |
| Cryptocercidae | <p><i>Cryptocercus primarius</i></p> <p><i>Cryptocercus</i> <b>sp.</b></p>                                                                                                                                                                                                                                                                                                                                                                                                                                                                                                                                                                                                                                                                                                          | <p>Dacaoping, Pingwu, Mianyang, Sichuan</p> <p>Pudacuo, Shangri-la, Diqing, Yunnan</p>                                                                                                                                                                                                                                                                                                                                                                                                                                                                                                                                                                                                                                                | <p>Zongqing Wang, Shunhua Gui</p> <p>Yan shi, Qikun Bai</p>                                                                                                                                                                                                                                                                                                                                                                                                                 |

Table S2 The PCR conditions used for the genes amplification (35 cycles after initial denaturing)

| Genes | Initial denaturing | Denaturation | Annealing   | Extension | Finally an extension |
|-------|--------------------|--------------|-------------|-----------|----------------------|
| 12S   | 95°C/3 min         | 94°C/30s     | 49°C/45-60s | 72°C/90s  | 72°C/5 min           |
| 16S   | 94°C/10 min        | 94°C/45s     | 48-63°C/45s | 72°C/60s  | 72°C/5 min           |
| 28S   | 94°C/5 min         | 94°C/30s     | 55°C/45s    | 72°C/90s  | 72°C/7 min           |
| COII  | 94°C/3 min         | 94°C/30s     | 56°C/45s    | 72°C/90s  | 72°C/7 min           |
| H3    | 94°C/1 min         | 94°C/15s     | 46°C/15s    | 72°C/15s  | 72°C/6 min           |

**Table S3.** Genbank numbers for included sequences. The colours indicate the sources of the sequences.

| Order            | Family         | Subfamily       | Species                                     | 12S      | 28S               | COII              | H3                | 16S      |
|------------------|----------------|-----------------|---------------------------------------------|----------|-------------------|-------------------|-------------------|----------|
| <b>Outgroups</b> |                |                 |                                             |          |                   |                   |                   |          |
| Ephemeroptera    |                |                 | <i>Ephemera danica</i>                      | KF855788 | KF855809          | KF855909          | KF855887          | KF855860 |
| Dermaptera       |                |                 | <i>Forficula auricularia</i>                | KF855790 | JN615313          | KF855911          | GU066905          | JN615260 |
|                  |                |                 | <i>Labidura riparia</i>                     | *        | AY555539/AY707435 | AF140544          | AY707435          | AY144640 |
| Plecoptera       |                |                 | <i>Cosmioperla australis</i>                | EF623307 | EF622852          | EF623009          | EF622577          | EF623148 |
|                  |                |                 | <i>Perlodes mortoni</i>                     | KF855796 | KF855814          | KF855916          | KF855892          | KF855870 |
| Odonata          |                |                 | <i>Enallagma cyathigerum</i>                | KF855787 | KF855808          | KF855908          | KF855886          | KF855858 |
| Orthoptera       |                |                 | <i>Omocestus rufipes</i>                    | KF855795 | KF855813          | KF855915          | KF855891          | KF855866 |
|                  |                |                 | <i>Gryllus</i>                              | AY560539 | AY521799          | U88332            | AY521719          | JX269093 |
| Mantophasmatodea |                |                 | <i>Karooophasma biedouwienensis</i>         | KF855791 | KF855810          | KF855912          | KF855889          | AY318896 |
|                  |                |                 | Mantophasmatidae                            | DQ874066 | DQ874231          | DQ874300          | GU066922          | AY318883 |
| Neoptera         |                |                 | <i>Galloisiana yuasai</i>                   | DQ457209 | KC142429          | KC142845          | DQ457381          | JN615261 |
|                  |                |                 | <i>Grylloblatta campodeiformes</i>          | DQ457227 | AY125279          | DQ457367          | AY125225          | DQ457263 |
| Phasmatodea      |                |                 | <i>Timema podura</i>                        | KF855798 | KF855816          | KF855918          | KF855895          | KF855873 |
|                  |                |                 | <i>Agathemera crassa</i>                    | Z93282   | AY125326          | *                 | AY125269          | JN228847 |
|                  |                |                 | <i>Extatosoma tiaratum</i>                  | AB642680 | AY125295          | FJ474359          | FJ474207          | Y07552   |
|                  |                |                 | <i>Bacillus rossius</i>                     | GU001956 | AY125320          | AF148289          | AY125263          | GU001956 |
| Embioptera       |                |                 | Oligotomidae                                | AB639034 | AY125274          | AB639034          | AY125221          | EU157039 |
|                  |                |                 | <i>Metoligotoma bidens</i>                  | *        | EU157052          | EU157066          | EU157032          | EU157040 |
| Mantodea         | Chaeteessidae  |                 | <i>Chaeteessa valida</i> Mn217              | FJ806061 | *                 | *                 | FJ806788          | FJ806237 |
|                  | Mantoididae    |                 | <i>Mantoida schraderi</i>                   | EF383155 | AY491219          | AY491275          | AY491333          | EF383315 |
|                  |                |                 | <i>Mantoida</i> sp. MN110                   | FJ806015 | FJ806576          | FJ806904          | FJ806740          | FJ806190 |
|                  | Thespidae      |                 | <i>Bantia werneri</i>                       | FJ806017 | FJ806578          | FJ806906          | FJ806742          | FJ806192 |
|                  | Metallyticidae |                 | <i>Metallyticus fallax</i>                  | EF383237 | EF383721          | EF384007          | EF384136          | EF383397 |
|                  | Thespidae      |                 | <i>Hoplocorypha</i> sp. MN190               | FJ806050 | FJ806616          | FJ806941          | FJ806777          | FJ806226 |
|                  | Mantidae       |                 | <i>Mantis religiosa</i>                     | U17792   | FJ806632          | EF363226          | AY491327          | EF383311 |
|                  |                |                 | <i>Sphodromantis viridis</i>                | FJ805977 | FJ806538          | GU064720          | GU064761          | FJ806154 |
| <b>Ingroups</b>  |                |                 |                                             |          |                   |                   |                   |          |
| Blattodea        | Corydiidae     | Latindiinae     | <i>Latindia</i> sp.                         | KF855802 | KF855822          | *                 | KF855898          | *        |
|                  |                | Incerta sedis   | <i>Paralatinidia</i> sp.                    | KF855803 | KF855823          | *                 | *                 | KF855868 |
|                  | Nocticolidae   |                 | <i>Nocticola australiensis</i> (Donna Cave) | DQ874070 | DQ874234          | *                 | EF203093          | KF855864 |
|                  |                |                 | <i>Nocticola</i> sp.1 (Cutta Cutta Cave)    | KF855794 | JN615357          | JN615401/EF203093 | JN615401/EF203093 | JN615302 |
|                  |                |                 | <i>Nocticola babindaensis</i>               | KF855785 | KF855819          | *                 | KF855879          | KF855852 |
|                  |                |                 | <i>Nocticola</i> sp. 1 (China)              | MF286833 | MF286962          | *                 | MF287026          | *        |
|                  | Corydiidae     |                 | <i>Polyphagoides cantrelli</i>              | KF855797 | KF855815          | KF855917          | KF855894          | KF855872 |
|                  |                | Euthyrrhaphinae | <i>Euthyrrhapha pacifica</i>                | DQ874050 | DQ874218          | KF855910          | KF855888          | KF855861 |

|            |                       |                                    |          |          |          |          |          |
|------------|-----------------------|------------------------------------|----------|----------|----------|----------|----------|
|            | Holocompsinae         | <i>Holocompsa</i> sp. 1            | DQ874056 | DQ874223 | KF855922 | *        | KF855862 |
|            | Tiviinae              | <i>Tivia</i> sp. 1                 | DQ874104 | DQ874259 | KF855919 | DQ874021 | KF855874 |
|            |                       | <i>Polyphaga aegyptiaca</i>        | DQ874089 | DQ874248 | DQ874317 | KF855893 | KF855871 |
|            | Polyphaginae          | <i>Ergaula capucina</i>            | KF855789 | DQ874214 | DQ874280 | DQ873966 | JN615300 |
|            |                       | <i>Eupolyphaga yunnanensis</i>     | MF286819 | MF286951 | MF287034 | MF287031 | MF286886 |
|            |                       | <i>Polyphaga plancyi</i>           | MF286821 | MF286953 | *        | MF287033 | MF286895 |
|            |                       | <i>Eupolyphaga sinensis</i>        | MF286820 | MF286952 | MF287035 | MF287032 | MF286887 |
|            |                       | <i>Eucorydia purpuralis</i>        | MF286822 | MF286954 | MF287042 | *        | MF286888 |
|            |                       | <i>Ergaula</i> sp.                 | MF286823 | MF286955 | MF287075 | MF286996 | MF286889 |
| Ectobiidae | Ectobiinae            | <i>Ectobius pallidus</i>           | DQ874040 | DQ874210 | DQ874276 | DQ873962 | *        |
|            |                       | <i>Ectobius lapponicus</i>         | DQ874039 | DQ874209 | DQ874275 | DQ873961 | *        |
|            |                       | <i>Ectobius sylvestris</i>         | KF372466 | KF372441 | *        | *        | KP986292 |
|            |                       | <i>Ectobius panzeri</i>            | DQ874041 | DQ874211 | DQ874277 | DQ873963 | KF855859 |
|            | Pseudophyllodromiinae | <i>Shelfordina volubilis</i> 01    | MF286777 | MF286922 | MF287079 | MF287023 | MF286848 |
|            |                       | <i>Shelfordina volubilis</i> 02    | MF286778 | MF286923 | MF287091 | MF287024 | MF286849 |
|            |                       | <i>Allacta ornata</i> 03           | MF286776 | MF286921 | *        | MF286969 | MF286847 |
|            |                       | <i>Sorineuchora nigra</i> 01       | MF286783 | MF286963 | MF287065 | MF286992 | MF286854 |
|            |                       | <i>Balta valida</i> 01             | MF286767 | MF286898 | MF287077 | MF286967 | MF286836 |
|            |                       | <i>Balta valida</i> 02             | MF286768 | MF286899 | MF287078 | MF286968 | MF286837 |
| Ectobiidae | Blattellinae          | <i>Ischnoptera</i> sp.1            | DQ874059 | DQ874226 | DQ874293 | DQ873979 | *        |
|            |                       | <i>Ischnoptera</i> sp.3            | DQ874024 | DQ874194 | DQ874261 | DQ873944 | KF855863 |
|            |                       | <i>Haplosymploce aurantiaca</i> 01 | MF286779 | MF286924 | MF287080 | MF287014 | MF286850 |
|            |                       | <i>Haplosymploce aurantiaca</i> 03 | MF286780 | MF286925 | MF287081 | MF287015 | MF286851 |
|            |                       | <i>Symploce striata</i> 01         | MF286792 | MF286911 | MF287064 | MF287008 | MF286864 |
|            |                       | <i>Symploce evidens</i> 01         | MF286770 | MF286914 | MF287068 | MF287006 | MF286840 |
|            |                       | <i>Symploce evidens</i> 02         | MF286771 | MF286915 | MF287069 | MF287007 | MF286841 |
|            |                       | <i>Blattella nipponica</i> 01      | MF286789 | MF286905 | MF287058 | MF286994 | MF286858 |
|            |                       | <i>Blattella nipponica</i> 02      | MF286788 | MF286910 | MF287063 | MF286995 | MF286863 |
|            |                       | <i>Blattella bisignata</i>         | MF286787 | MF286909 | MF287062 | MF286997 | MF286862 |
|            |                       | <i>Blattella germanica</i>         | AY536379 | DQ874201 | DQ874268 | DQ873952 | EF363265 |
|            |                       | <i>Blattella germanica</i>         | MF286781 | MF286900 | MF287085 | MF286993 | MF286852 |
|            |                       | <i>Symploce torchaceus</i> 01      | MF286785 | MF286903 | MF287056 | MF287013 | MF286856 |
|            |                       | <i>Episymploce hunanensis</i>      | MF286784 | MF286902 | MF287055 | MF287009 | MF286855 |
|            |                       | <i>Episymploce kunmingi</i>        | MF286786 | MF286904 | MF287057 | MF287010 | MF286857 |
|            |                       | <i>Episymploce mamillatus</i> 01   | MF286790 | MF286906 | MF287059 | MF287011 | MF286859 |
|            |                       | <i>Episymploce mamillatus</i> 02   | MF286791 | MF286907 | MF287060 | MF287012 | MF286860 |
|            |                       | <i>Symplocodes ridleyi</i> 03      | MF286831 | MF286916 | *        | MF287001 | MF286842 |
|            |                       | <i>Symplocodes marmorata tsaii</i> | MF286769 | MF286913 | MF287070 | MF287000 | MF286839 |

|            |                       |                                           |          |          |          |          |          |
|------------|-----------------------|-------------------------------------------|----------|----------|----------|----------|----------|
|            |                       | <i>Hemithyrsocera banvaneuensis</i> 01    | MF286774 | MF286919 | *        | MF287004 | MF286845 |
|            |                       | <i>Hemithyrsocera banvaneuensis</i> 02    | MF286775 | MF286920 | *        | MF287005 | MF286846 |
|            |                       | <i>Hemithyrsocera simulans</i> 02         | MF286772 | MF286917 | *        | MF287002 | MF286843 |
|            |                       | <i>Hemithyrsocera simulans</i> 03         | MF286773 | MF286918 | *        | MF287003 | MF286844 |
|            |                       | <i>Lobopterella dimidiatipes</i> 01       | MF286765 | MF286896 | MF287087 | MF286998 | MF286834 |
|            |                       | <i>Lobopterella dimidiatipes</i> 02       | MF286766 | MF286897 | MF287088 | MF286999 | MF286835 |
|            |                       | <i>Anaplectoidea varia</i> 01             | MF286793 | MF286964 | MF287066 | MF287027 | MF286865 |
|            |                       | <i>Anaplectoidea spinea</i> 01            | MF286794 | MF286912 | MF287067 | MF287028 | MF286866 |
|            |                       | <i>Sigmella schenklingi</i> 01            | MF286806 | MF286908 | MF287061 | MF287016 | MF286861 |
|            | Pseudophyllodromiinae | <i>Latiblattella</i> sp. 3                | DQ874061 | *        | DQ874295 | DQ873981 | *        |
|            | Nyctiborinae          | <i>Paratropes</i> sp. 1                   | DQ874080 | KF855824 | DQ874309 | DQ873999 | KF855869 |
|            |                       | <i>Nyctibora</i> sp.1                     | DQ874072 | KF855812 | DQ874303 | DQ873991 | KF855865 |
| Blaberidae | Oxyhaloinae           | <i>Nauphoeta cinerea</i>                  | DQ874068 | DQ874233 | DQ874301 | DQ873988 | EF363272 |
|            | Blaberinae            | <i>Blaptica dubia</i>                     | DQ874030 | DQ874199 | DQ874266 | DQ873950 | JN615274 |
|            |                       | <i>Phoetalia pallida</i>                  | DQ874086 | DQ874245 | DQ874314 | DQ874004 | JN615278 |
|            | Panchlorinae          | <i>Panchlora azteca</i>                   | DQ874076 | DQ874238 | DQ874305 | DQ873995 | KF855867 |
|            |                       | <i>Panchlora</i> sp.                      | *        | MF286940 | MF287071 | MF287022 | MF286880 |
|            | Panesthiinae          | <i>Panesthia sinuata</i> 01               | MF286797 | MF286928 | MF287043 | MF286972 | MF286869 |
|            |                       | <i>Panesthia sinuata</i> 02               | MF286798 | MF286929 | MF287044 | MF286973 | MF286870 |
|            |                       | <i>Panesthia angustipennis cognata</i> 01 | MF286799 | MF286930 | MF287045 | MF286974 | MF286894 |
|            |                       | <i>Panesthia angustipennis cognata</i> 02 | MF286832 | MF286931 | MF287048 | MF286975 | MF286871 |
|            |                       | <i>Panesthia birmanica</i> 01             | MF286795 | MF286926 | MF287046 | MF286970 | MF286867 |
|            |                       | <i>Panesthia birmanica</i> 02             | MF286796 | MF286927 | MF287047 | MF286971 | MF286868 |
|            |                       | <i>Salganea raggei</i> 01                 | MF286804 | MF286936 | MF287053 | MF286980 | MF286876 |
|            |                       | <i>Salganea raggei</i> 02                 | MF286805 | MF286937 | MF287054 | MF286981 | MF286877 |
|            |                       | <i>Salganea incerta</i> 01                | MF286802 | MF286933 | MF287052 | MF286978 | MF286873 |
|            |                       | <i>Salganea incerta</i> 02                | MF286803 | MF286934 | MF287050 | MF286979 | MF286875 |
|            |                       | <i>Salganea taiwanensis</i> 01            | MF286800 | MF286932 | MF287049 | MF286976 | MF286872 |
|            |                       | <i>Salganea taiwanensis</i> 02            | MF286801 | MF286934 | MF287051 | MF286977 | MF286874 |
|            | Perisphaerinae        | <i>Perisphaerus</i> sp.1                  | MF286815 | MF286947 | MF287089 | MF286982 | *        |
|            |                       | <i>Corydidarum</i> sp.                    | MF286817 | MF286949 | MF287083 | MF286984 | *        |
|            |                       | <i>Corydidarum</i> sp.                    | MF286818 | MF286950 | MF287082 | MF286985 | *        |
|            |                       | <i>Perisphaerus</i> sp.2                  | MF286816 | MF286948 | *        | MF286983 | *        |
|            | Epilamprinae          | <i>Opisthoplatia orientalis</i>           | MF286811 | MF286943 | *        | MF286986 | MF286883 |
|            |                       | <i>Pseudophoraspis</i> sp.                | MF286813 | MF286945 | MF287090 | MF286988 | *        |
|            |                       | <i>Stictolampra</i> sp.                   | MF286812 | MF286944 | MF287073 | MF286987 | MF286884 |
|            |                       | <i>Rhabdoblatta</i> sp.                   | MF286814 | MF286946 | MF287074 | MF286989 | MF286885 |

|                 |                  |                                      |          |          |          |          |          |
|-----------------|------------------|--------------------------------------|----------|----------|----------|----------|----------|
|                 | Dipterinae       | <i>Diploptera punctata</i>           | MF286807 | MF286938 | *        | MF286990 | MF286878 |
|                 | Paranauphoetinae | <i>Paranauphoeta</i> sp.1, China     | MF286810 | MF286942 | *        | MF287030 | MF286882 |
|                 |                  | <i>Paranauphoeta vicina sinica</i>   | MF286809 | MF286941 | MF287072 | MF287029 | MF286881 |
|                 | Pycnoscelinae    | <i>Pycnoscelus</i> sp.1, China       | MF286808 | MF286939 | MF287084 | MF286991 | MF286879 |
| Blattidae s.s.  | Duchailiinae     | <i>Duchailiua</i> sp.                | KF855786 | KF855807 | KF855907 | KF855885 | KF855857 |
|                 | Polyzostorinae   | <i>Drymaplaneta cf. semivitta</i>    | DQ874038 | DQ874208 | DQ874274 | DQ873960 | KF855856 |
|                 |                  | <i>Eurycotis floridana</i>           | DQ874046 | JN615351 | DQ874283 | DQ873968 | JN615296 |
|                 | Blattinae        | <i>Deropeltis erythrocephala</i>     | DQ874035 | DQ874205 | DQ874271 | DQ873957 | KF855855 |
|                 |                  | <i>Archiblatta hoeveni</i>           | DQ874026 | DQ874196 | DQ874262 | DQ873946 | KF855851 |
|                 |                  | <i>Periplaneta australasiae</i>      | DQ874081 | DQ874242 | DQ874310 | DQ874000 | U17808   |
|                 |                  | <i>Homalosilpha kryzhanovskii</i> 01 | MF286825 | *        | MF287037 | MF287020 | MF286890 |
|                 |                  | <i>Homalosilpha arcifera</i> 01      | MF286824 | MF286956 | MF287036 | MF287019 | *        |
|                 |                  | <i>Melanozosteria</i> sp.            | MF286828 | MF286959 | MF287039 | MF287021 | *        |
|                 |                  | <i>Protagonista lugubris</i> 01      | MF286826 | MF286957 | MF287038 | MF287017 | MF286838 |
|                 |                  | <i>Protagonista lugubris</i> 05      | MF286827 | MF286958 | MF287076 | MF287018 | MF286891 |
| Lamproblattidae |                  | <i>Lamproblatta albipalpus</i>       | KF855792 | KF855821 | KF855913 | *        | JN615295 |
| Tryonicidae     |                  | <i>Tryonicus parvus</i> (AU)         | KF855799 | KF855817 | KF855920 | KF855896 | KF855875 |
|                 |                  | <i>Lauraesilpha</i>                  | KF855793 | KF855811 | KF855914 | KF855890 | EU486045 |
|                 |                  | <i>Tryonicus vicina</i> (NC)         | KF855800 | KF855818 | KF855921 | KF855897 | KF855876 |
| Anaplectidae    |                  | <i>Anaplecta asema</i>               | KF855780 | KF855804 | KF855901 | KF855880 | *        |
|                 |                  | <i>Anaplecta bivittata</i>           | KF855781 | KF855805 | KF855902 | KF855881 | KF855846 |
|                 |                  | <i>Anaplecta lateralis</i>           | KF855784 | KF855806 | KF855904 | KF855883 | KF855849 |
|                 |                  | <i>Anaplecta decipiens</i>           | KF855783 | KF855820 | KF855899 | KF855878 | KF855848 |
|                 |                  | <i>Anaplecta</i> sp. 3               | KF855801 | *        | KF855900 | KF855877 | KF855850 |
|                 |                  | <i>Anaplecta omei</i> 01             | MF286782 | MF286901 | MF287086 | MF287025 | MF286853 |
|                 |                  | <i>Anaplecta calosoma</i>            | KF855782 | *        | KF855903 | KF855882 | KF855847 |
| Mastotermitidae | Isoptera         | <i>Mastotermes darwiniensis</i>      | DQ441730 | DQ441950 | EU253885 | GU066915 | EF623172 |
| Termopsidae     |                  | <i>Porotermes quadricollis</i>       | DQ441794 | DQ442010 | DQ442222 | *        | *        |
|                 |                  | <i>Zootermopsis angusticollis</i>    | DQ441841 | AY859614 | DQ442267 | *        | U50778   |
| Rhinotermitidae |                  | <i>Rhinotermes marginalis</i>        | EU253715 | EU253674 | EU253890 | *        | EU253754 |
| Termitidae      |                  | <i>Termes hispaniolae</i>            | EU253733 | EU253691 | FJ806886 | *        | FJ806151 |
| Kalotermitidae  |                  | <i>Cryptotermes secundus</i>         | DQ441676 | DQ441901 | DQ442111 | *        | KF855854 |
| Hodotermitidae  |                  | <i>Microhodotermes viator</i>        | DQ441739 | DQ441959 | DQ442169 | *        | AF262619 |
| Cryptocercidae  |                  | <i>Cryptocercus punctulatus</i>      | DQ441677 | DQ441902 | AB005462 | DQ873955 | U38408   |
|                 |                  | <i>Cryptocercus relictus</i>         | AY631411 | *        | KF855906 | *        | AB078597 |
|                 |                  | <i>Cryptocercus kyebangensis</i>     | AF310221 | FJ806522 | KF855905 | KF855884 | KF855853 |
|                 |                  | <i>Cryptocercus primarius</i>        | MF286830 | MF286960 | MF287041 | MF286966 | MF286893 |
|                 |                  | <i>Cryptocercus</i> sp.              | MF286829 | MF286961 | MF287040 | MF286965 | MF286892 |



### Main sequence sources (colour coded):

#### Sequenced for present study

Djernæs et al. (2015)

Inward et al. (2007a)

Svenson and Whiting (2009)

Djernæs et al. (2012)

Whiting et al. (2003)

Svenson and Whiting (Unpubl.)

Inward et al (2007b)

Legendre et al. (2008)

Legendre et al. (2014)

Legendre et al. (2015)

Terry and Whiting (Unpubl.)

Svenson and Whiting (2004)

Jarvis and Whiting (2006)

Various others

### References:

Djernæs, M., Klass, K.-D., Picker, M.P. & Damgaard, J. (2012). Phylogeny of cockroaches (Insecta, Dictyoptera, Blattodea), with placement of aberrant taxa and exploration of out-group sampling. *Systematic Entomology* **37**: 65-83.

Djernæs, M., Klass, K.-D. & Eggleton, P. (2015). Identifying possible sister groups of Cryptocercidae+Isoptera: A combined molecular and morphological phylogeny of Dictyoptera. *Molecular Phylogenetics and Evolution* **84**: 284-303.

Inward, D., Beccaloni, G. & Eggleton, P. (2007a). Death of an order: a comprehensive molecular phylogenetic study confirms that termites are eusocial cockroaches. *Biological Letters* **3**: 331-335.

Inward, D., Vogler, A.P. & Eggleton, P. (2007b). A comprehensive phylogenetic analysis of termites (Isoptera) illuminates key aspects of their evolutionary biology. *Molecular Phylogenetics and Evolution* **44**: 953-967.

Legendre, F., Whiting, M.F., Bordereau, C., Canello, E.M., Evans, T.A. & Grandcolas, P. (2008) The phylogeny of termites (Dictyoptera: Isoptera) based on mitochondrial and nuclear markers: implications for the evolution of the worker and pseudergate castes, and foraging behaviors. *Molecular Phylogenetics and Evolution* **48**: 615-627.

Jarvis, K.J. & Whiting, M.F. (2006) Phylogeny and biogeography of ice crawlers (Insecta: Grylloblattodea) based on six molecular loci: designating conservation status for Grylloblattodea species. *Molecular Phylogenetics and Evolution* **41**: 222-237.

Svenson, G.J. & Whiting, M.F. (2004) Phylogeny of Mantodea based on molecular data: evolution of a charismatic predator. *Systematic Entomology* **29**: 359-370.

Svenson, G.J., Whiting, M.F. (2009). Reconstructing the origins of praying mantises (Dictyoptera, Mantodea): the roles of Gondwanan vicariance and morphological convergence. *Cladistics* **25**: 468-514.

Whiting, M.F., Bradler, S. & Maxwell, T. (2003) Loss and recovery of wings in stick insects. *Nature* **421**, 264–267.

Legendre, F., D'Haese, C.A., Deleporte, P., Pellens, R., Whiting, M.F., Schliep, K. & Grandcolas, P. (2014) The evolution of social behaviour in Blaberid cockroaches with diverse habitats and social systems: phylogenetic analysis of behavioural sequences. *Biological Journal of the Linnean Society* **111**: 58-77.

Legendre, F., Nel, A., Svenson, G.J., Robillard, T., Pellens, R. & Grandcolas, P. (2015) Phylogeny of Dictyoptera: Dating the Origin of Cockroaches, Praying Mantises and Termites with Molecular Data and Controlled Fossil Evidence. *PLoS ONE* **10**: 1-27.



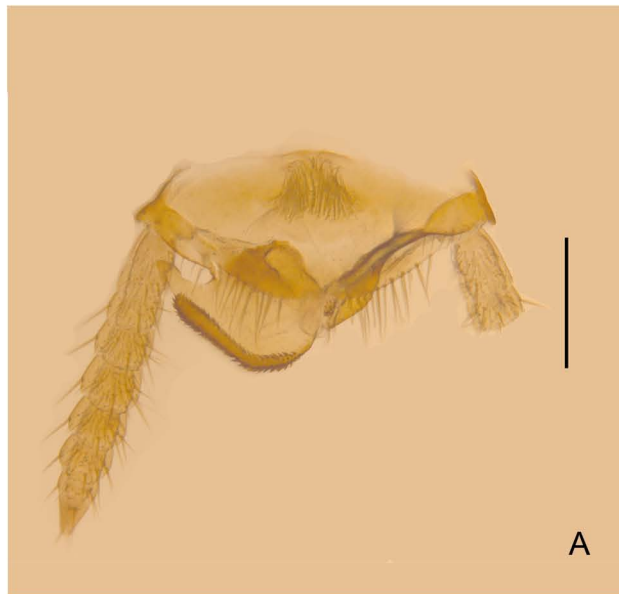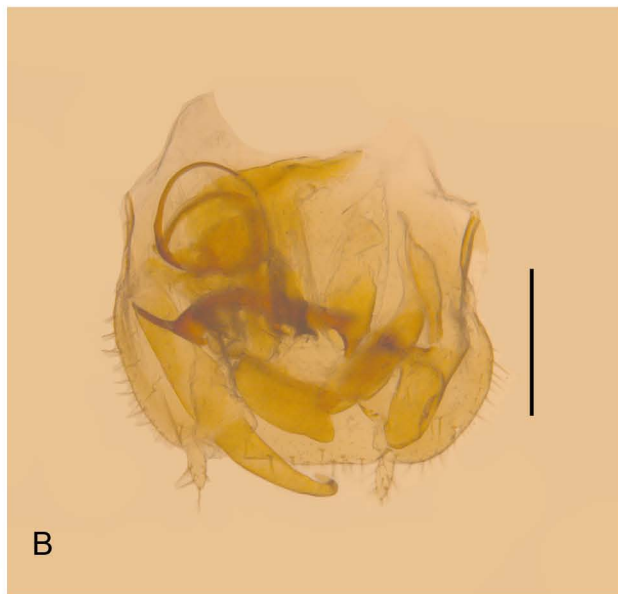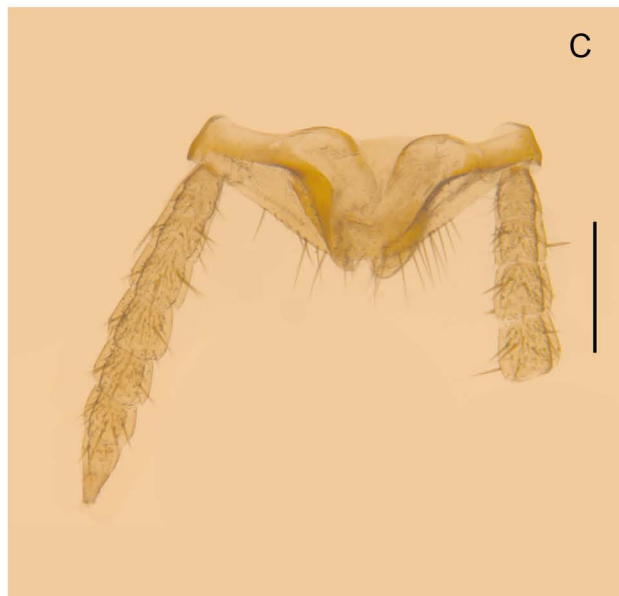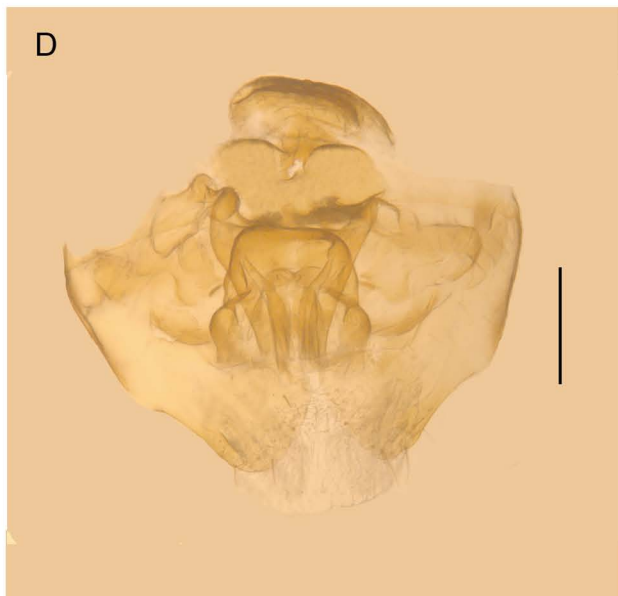

Supplement: 41598_2017_4243_MOESM1_ESM.pdf [file 41598_2017_4243_MOESM1_ESM.pdf]
